# Supplementary material for: Antiretroviral treatment indications and adherence to the German-Austrian treatment initiation guidelines in the German ClinSurv HIV Cohort between 1999 and 2016
Source: Springer Nature journal article supplement (doi:10.1007/s15010-018-1248-8), 2018-11-09
Supplement: MOESM1 [file 16262280]

Supplementary Table 1. German-Austrian cART guidelines applicable for each year, considering patients with treatment indication due to the CD4+T cell count thresholds.

*cART was always recommended for patients with a CDC stage C, > 50 years of age, viral load > 100,000.

| Therapy guidelines | CD4+T-cells/mm3 | cART* |
| --- | --- | --- |
| 2002-2007 |  |  |
|  | <200 | Recommended |
|  | 200-349 | Consider/offer |
|  | 350-500 | Consider/offer |
|  | >500 | Generally not recommended |
| 2008-2014 |  |  |
|  | <200 | Recommended |
|  | 200-349 | Recommended |
|  | 350-500 | Consider/offer |
|  | >500 | Generally not recommended |
| 2015-2016 |  |  |
|  | <200 | Recommended |
|  | 200-349 | Recommended |
|  | 350-500 | Recommended |
|  | >500 | Recommended |
|  |  |  |

Supplementary Table 2. Binary and multivariable logistic regression model for non-adherence (cART initiation within six months after the First Visit (FV), without treatment indication) displayed with OR and 95% CI, adjusted for gender, region of origin, year of FV, HIV disease classification (Center for Disease Control and Prevention (CDC) categories A, B & C) at FV and VL at FV (n= 1,316).

|  | Univariate analysis | | Multivariable analysis | |
| --- | --- | --- | --- | --- |
|  | **OR (95% CI)** | ***p-value*** | **OR (95% CI)** | ***p-value*** |
| **Total** |  |  |  |  |
| **VL FV** |  |  |  |  |
| <10,000 |  |  |  |  |
| 10,000-99,999 | 0.92 (0.70-1.19) | 0.513 |  |  |
| **FV Year** |  |  |  |  |
| 2002-2007 |  |  |  |  |
| 2008-2014 | 2.63 (2.09-3.31) | **0.000** | 2.89 (2.17-3.87) | **0.000** |
| **Age (groups)** |  |  |  |  |
| 18-39 | 1.05 (.053-2.08) | 0.887 |  |  |
| 40-69 | 0.73 (0.37-1.43) | 0.365 |  |  |
| ≥70 |  |  |  |  |
| **Gender** |  |  |  |  |
| Male |  |  |  |  |
| Female | 1.66 (1.27-2.17) | **0.000** | 1.65 (1.07-2.57) | **0.025** |
| **Risk** |  |  |  |  |
| MSM | 0.71 (0.53-0.97) | **0.031** |  |  |
| PWID | 0.76 (0.44-1.31) | **0.043** | 0.84 (0.43-1.66) | 0.617 |
| HTS |  |  |  |  |
| ENDEMIC* | 1.13 (0.70-1.83) | 0.609 | 0.70 (0.20-2.38) | 0.571 |
| Others/Unknown | 1.36 (0.91-2.03) | 0.126 | 1.99 (1.29-3.07) | **0.002** |
| **Region of origin** |  |  |  |  |
| Europe |  |  |  |  |
| North-East Africa | 1.52 (0.47-4.96) | 0.490 | 2.05 (0.51-8.36) | 0.314 |
| Sub-Saharan Africa | 1.50 (0.98-2.30) | 0.061 | 2.17 (0.67-7.08) | 0.198 |
| Asia, Australia & New Zealand | 1.70 (0.73-4.02) | 0.221 | 2.78 (1.05-7.38) | **0.040** |
| North & Latin America | 1.05 (0.47-2.34) | 0.904 | 1.06 (0.38-2.97) | 0.902 |
| **CDC Category** |  |  |  |  |
| A&B | 0.75 (0.30-1.88) | 0.548 |  |  |
| C |  |  |  |  |
|  |  |  |  |  |

Supplementary Table 3. Median time (months) to initiate cART and baseline characteristics (Kaplan-Meyer method) with overall and pairwise comparison using Log-rank test (n=11,817).

|  | Median time (months) to start cART (95% CI) | Overall comparison  p-value* | Pairwise comparison p-value** | | | | |  |
| --- | --- | --- | --- | --- | --- | --- | --- | --- |
| **Gender** |  | 0.291 | Female | Male |  |  |  |  |
| Female | 1 (0.7, 1.1) |  |  | 0.291 |  |  |  |  |
| Male | 1 (0.8, 1.2) |  | 0.291 |  |  |  |  |  |
| **Risk group** |  | **<0.001** | MSM | PWID | HTS | Endemic area | Other |  |
| MSM | 2 (1.7, 2.2) |  |  | **<0.001** | 0.242 | **<0.001** | **<0.001** |  |
| PWID | 4 (2.0, 5.9) |  | **<0.001** |  | **<0.001** | **<0.001** | **<0.001** |  |
| HTS | 1 (0.7, 1.2) |  | 0.242 | **<0.001** |  | **<0.001** | **<0.001** |  |
| Endemic area | n.a. |  | **<0.001** | **<0.001** | **<0.001** |  | 0.892 |  |
| Other | n.a. |  | **<0.001** | **<0.001** | **<0.001** | 0.892 |  |  |
| **Country of origin** |  | **<0.001** | Europe | North-East Africa | Sub-Saharan Africa | Asia Australia & New Zealand | North & Latin America |  |
| Europe | 1 (0.8, 1.2) |  |  | **0.043** | **<0.001** | **<0.001** | 0.860 |  |
| North-East Africa | n.a |  | **0.043** |  | 0.517 | 0.963 | 0.108 |  |
| Sub-Saharan Africa | 1 (0.3, 4.5) |  | **<0.001** | 0.517 |  | 0.155 | 0.029 |  |
| Asia Australia & New Zealand | 1 (0.2, 4.5) |  | **<0.001** | 0.963 | 0.155 |  | 0.004 |  |
| North & Latin America | 2 (1.1, 2.8) |  | 0.860 | 0.108 | 0.029 | 0.004 |  |  |
| **CD4+ T cell count/µl at FV** |  | **<0.001** | <200 | 200 - 349 | 350 - 499 | >500 |  |  |
| <200 | n.a. |  |  | **<0,001** | **<0.001** | **<0.001** |  |  |
| 200 - 349 | 2 (1.8, 2.1) |  | **<0.001** |  | **<0.001** | **<0.001** |  |  |
| 350 - 499 | 10 (8.9, 11.1) |  | **<0.001** | **<0.001** |  | **<0.001** |  |  |
| >500 | 25 (23.0, 26.9) |  | **<0.001** | **<0.001** | **<0.001** |  |  |  |
| **Viral load (copies/µl)** |  | **<0.001** | 0 - 9,999 | 10,000 - 99,999 | ≥100,000 |  |  |  |
| 0 - 9,999 | 7 (5.3, 8.7) |  |  | **<0.001** | **<0.001** |  |  |  |
| 10,000 - 99,999 | 3 (2.6, 3.4) |  | **<0.001** |  | **<0.001** |  |  |  |
| ≥100,000 | n.a. |  | **<0.001** | **<0.001** |  |  |  |  |
| **Age (years)** |  | **<0.001** | 18-49 | ≥50 |  |  |  |  |
| 18-49 | 2 (1, 2.2) |  |  | **<0.001** |  |  |  |  |
| ≥50 | 0 (0, 4.2) |  | **<0.001** |  |  |  |  |  |
| **Year of FV** |  | **<0.001** | <2001 | 2002-2007 | 2008-2014 | 2015-2016 |  |  |
| <2001 | 2 (2.1, 3.8) |  |  | **<0.001** | **<0.001** | **<0.001** |  |  |
| 2002-2007 | 2 (1.7, 2.2) |  | **<0.001** |  | **<0.001** | **<0.001** |  |  |
| 2008-2014 | n.a. |  | **<0.001** | **<0.001** |  | **<0.001** |  |  |
| 2015-2016 | n.a. |  | **<0.001** | **<0.001** | **<0.001** |  |  |  |
| **CDC category at FV** |  | **<0.001** | A | B | C |  |  |  |
| A | n.a. |  |  | 0.125 | 0.841 |  |  |  |
| B | n.a. |  | 0.125 |  | **<0.001** |  |  |  |
| C | n.a. |  | 0.841 | **<0.001** |  |  |  |  |

*Log-rank overall comparison (p<0.05)

**Log-rank pairwise comparison with Bonferroni correction (significance level p<0.0167; p<0.0125 and p<0.01 were set for three, four and five group comparison). Not applicable (n.a.)
